# Supplementary material for: Nutritional and Physiological Properties of Thymbra spicata: In Vitro Study Using Fecal Fermentation and Intestinal Integrity Models
Source: MDPI journal article supplement (doi:10.3390/nu16050588), 2024-02-21
Supplement: s1 [file s1]

**Supplementary Table S1.** Concentration of Volatile Organic Compounds (VOCs), expressed as ppm, of Fecal Medium and Thymbra Digest (FMTD), Fecal Slurry (FS) and Fecal Slurry and Thymbra Digest (FSTD) samples. Data are expressed as average  $\pm$  standard deviation.

| Classes                         | Compounds                 | FMTD                     | FS                       | FSTD                     |
|---------------------------------|---------------------------|--------------------------|--------------------------|--------------------------|
|                                 |                           | Average $\pm$ St.<br>Dev | Average $\pm$ St.<br>Dev | Average $\pm$ St.<br>Dev |
| <b>Alcohols (8)</b>             | Isopropyl Alcohol         | 2.75 $\pm$ 0.84          | 0.08 $\pm$ 0.07          | 3.95 $\pm$ 6.83          |
|                                 | 1-Octanol                 | 0.07 $\pm$ 0.03          | 0.03 $\pm$ 0.03          | 0.13 $\pm$ 0.12          |
|                                 | 1-Octanol, 2-butyl-       | 1.15 $\pm$ 0.13          | 0.11 $\pm$ 0.12          | 0.08 $\pm$ 0.13          |
|                                 | 2-Decanol                 | 0.18 $\pm$ 0.11          | 0.07 $\pm$ 0.02          | 0.16 $\pm$ 0.20          |
|                                 | 1-Hexanol                 | n.d.                     | 0.06 $\pm$ 0.01          | 1.27 $\pm$ 1.95          |
|                                 | Menthol                   | n.d.                     | 11.92 $\pm$ 2.42         | 6.81 $\pm$ 0.80          |
|                                 | 1-Undecanol               | n.d.                     | 0.11 $\pm$ 0.10          | 0.46 $\pm$ 0.67          |
|                                 | 1-Hexadecanol             | n.d.                     | 0.78 $\pm$ 0.45          | 0.87 $\pm$ 0.15          |
| <b>Carboxylic<br/>Acids (9)</b> | Acetic acid               | 0.26 $\pm$ 0.44          | 0.43 $\pm$ 0.37          | 0.25 $\pm$ 0.15          |
|                                 | Dibutyl phthalate         | 0.03 $\pm$ 0.03          | 0.02 $\pm$ 0.02          | n.d.                     |
|                                 | Butanoic acid             | n.d.                     | 1.04 $\pm$ 1.45          | 2.14 $\pm$ 2.20          |
|                                 | Pentanoic acid            | n.d.                     | 1.23 $\pm$ 1.86          | 6.53 $\pm$ 2.98          |
|                                 | Propanoic acid            | n.d.                     | 0.25 $\pm$ 0.41          | 0.75 $\pm$ 0.50          |
|                                 | Propanoic acid, 2-methyl- | n.d.                     | 0.35 $\pm$ 0.61          | 0.85 $\pm$ 0.66          |
|                                 | Butanoic acid, 3-methyl-  | n.d.                     | 1.59 $\pm$ 2.75          | 4.13 $\pm$ 2.46          |
|                                 | Heptanoic acid            | n.d.                     | 0.09 $\pm$ 0.16          | 2.80 $\pm$ 1.19          |
|                                 | Octanoic Acid             | n.d.                     | 0.16 $\pm$ 0.27          | 0.85 $\pm$ 0.59          |
| <b>Hydrocarbons<br/>(23)</b>    | Decane                    | 0.99 $\pm$ 0.53          | 0.01 $\pm$ 0.02          | n.d.                     |
|                                 | Decane, 4-methyl-         | 0.08 $\pm$ 0.05          | 0.02 $\pm$ 0.02          | 0.20 $\pm$ 0.17          |
|                                 | Undecane, 5,7-dimethyl-   | 0.84 $\pm$ 0.41          | 0.04 $\pm$ 0.07          | 0.04 $\pm$ 0.06          |
|                                 | Undecane, 4,7-dimethyl-   | 1.11 $\pm$ 0.50          | 0.11 $\pm$ 0.12          | 0.19 $\pm$ 0.09          |
|                                 | Dodecane                  | 1.28 $\pm$ 0.48          | 0.08 $\pm$ 0.15          | n.d.                     |
|                                 | Benzene, tert-butyl-      | 0.26 $\pm$ 0.28          | n.d.                     | 0.11 $\pm$ 0.12          |

|                    |                                      |              |                |               |
|--------------------|--------------------------------------|--------------|----------------|---------------|
|                    | Undecane, 3,8-dimethyl-              | 1.44 ± 0.43  | 0.07 ± 0.06    | 0.52 ± 0.49   |
|                    | Benzene, 1,2,3,5-tetramethyl-        | 0.29 ± 0.31  | 1.57 ± 1.12    | 0.06 ± 0.06   |
|                    | Benzene, 1,2,4,5-tetramethyl-        | 7.66 ± 1.03  | 4.64 ± 1.39    | 4.41 ± 1.37   |
|                    | Tetradecane                          | 4.11 ± 2.14  | 0.33 ± 0.34    | n.d.          |
|                    | Hexane, 3,3-dimethyl-                | 0.54 ± 0.34  | 0.15 ± 0.13    | 0.18 ± 0.13   |
|                    | Benzene, pentamethyl-                | 1.79 ± 0.67  | 0.71 ± 0.18    | 0.78 ± 0.46   |
|                    | Hexadecane                           | 2.2 ± 1.51   | 0.10 ± 0.17    | n.d.          |
|                    | Naphthalene                          | 21.25 ± 7.10 | 13.19 ± 2.88   | 16.27 ± 8.32  |
|                    | Naphthalene,1-methyl-                | 4.71 ± 4.58  | 1.08 ± 1.87    | 4.70 ± 2.70   |
|                    | Naphthalene, 2-methyl-               | 7.31 ± 0.71  | 3.69 ± 0.63    | 3.40 ± 2.98   |
|                    | Naphthalene, 1,2-dimethyl-           | 0.10 ± 0.06  | n.d.           | 0.02 ± 0.03   |
|                    | 1,3-Benzodioxole, 5-propyl-          | 1.63 ± 1.42  | 0.04 ± 0.03    | 0.06 ± 0.06   |
|                    | Toluene                              | 0.02 ± 0.04  | n.d.           | 0.21 ± 0.23   |
|                    | Octane, 2,6,6-trimethyl-             | 0.23 ± 0.35  | n.d.           | 0.50 ± 0.86   |
|                    | Benzene, propyl-                     | 0.33 ± 0.30  | 0.62 ± 0.04    | n.d.          |
|                    | Benzene, 1,3-bis(1,1-dimethylethyl)- | n.d.         | 0.06 ± 0.02    | 0.08 ± 0.12   |
|                    | 1-Tridecene                          | n.d.         | 1.27 ± 1.13    | 1.70 ± 0.29   |
| <b>Indoles (3)</b> | Indole                               | 3.91 ± 1.41  | 132.24 ± 30.49 | 58.58 ± 20.84 |
|                    | 1H-Indole, 3-methyl-                 | 1.63 ± 1.84  | 6.68 ± 1.78    | 7.45 ± 3.09   |
|                    | 1H-Indole, 2,3-dihydro-4-methyl-     | n.d.         | 0.04 ± 0.03    | 0.01 ± 0.01   |
| <b>Others (28)</b> | Trimethylamine                       | 0.40 ± 0.12  | 0.50 ± 0.08    | 0.07 ± 0.06   |
|                    | Propanal, 2-methyl-                  | 0.46 ± 0.13  | 0.01 ± 0.01    | n.d.          |
|                    | Acetone                              | 1.34 ± 0.51  | 1.04 ± 0.24    | 1.24 ± 0.24   |
|                    | Hexane, 2,3,4-trimethyl-             | 0.16 ± 0.11  | 0.12 ± 0.11    | 0.04 ± 0.07   |
|                    | Butanal, 3-methyl-                   | 3.55 ± 1.39  | 0.19 ± 0.04    | n.d.          |
|                    | Methyl Isobutyl Ketone               | 3.02 ± 1.05  | 3.57 ± 0.26    | 3.57 ± 0.45   |
|                    | Decane, 2,4-dimethyl-                | 0.90 ± 0.42  | 0.59 ± 0.15    | 0.12 ± 0.12   |
|                    | 2-n-Propyl-1-heptanol                | 0.51 ± 0.58  | 0.08 ± 0.08    | 0.09 ± 0.16   |
|                    | Benzene_1_ethyl_2_4_dimethyl         | 1.25 ± 0.67  | 0.20 ± 0.11    | 0.45 ± 0.07   |
|                    | 1-Undecene, 7-methyl-                | 1.02 ± 0.43  | n.d.           | 0.04 ± 0.07   |
|                    | Nonanal                              | 1.11 ± 0.71  | 0.56 ± 0.27    | n.d.          |

|                      |                                                                                                                                                                             |               |              |               |
|----------------------|-----------------------------------------------------------------------------------------------------------------------------------------------------------------------------|---------------|--------------|---------------|
|                      | 1H-Indene, 2,3-dihydro-5-methyl-Benzaldehyde                                                                                                                                | 1.54 ± 0.52   | 0.58 ± 0.06  | 1.11 ± 0.72   |
|                      | 1H-Indene, 2,3-dihydro-4,7-dimethyl-2-Cyclohexen-1-one, 2-methyl-5-(1-methylethenyl)-, (S)-Benzaldehyde, 4-propyl-Benzophenone                                              | 12.89 ± 4.55  | 2.12 ± 0.42  | 0.29 ± 0.24   |
|                      | Ethanone, 1-(4-hydroxy-3methoxyphenyl)-Dimethylamine                                                                                                                        | 0.26 ± 0.10   | 0.07 ± 0.03  | 0.07 ± 0.02   |
|                      | 5-Hepten-2-one, 6-methyl-Cyclohexene, 4-ethenyl-4-methyl-3-(1-methylethenyl)-1-(1-methylethyl)-, (3R-trans)-1H-Indene, 2,3-dihydro-4,6-dimethyl-3-Hexadecene, (Z)-Dodecanal | 2.16 ± 0.82   | n.d.         | n.d.          |
|                      | Pentadecanal-2-Pentadecanone                                                                                                                                                | 8.64 ± 1.25   | 4.45 ± 0.58  | 5.74 ± 2.13   |
|                      | .gamma.-Dodecalactone                                                                                                                                                       | 0.81 ± 0.13   | 0.04 ± 0.01  | 0.12 ± 0.05   |
|                      | Tetradecanal                                                                                                                                                                | 0.22 ± 0.11   | n.d.         | 0.06 ± 0.02   |
|                      | Butylated Hydroxytoluene                                                                                                                                                    | 0.01 ± 0.01   | 0.01 ± 0.01  | n.d.          |
|                      | p-Cresol                                                                                                                                                                    | n.d.          | 0.48 ± 0.18  | 0.47 ± 0.22   |
|                      | 2,4-Di-tert-butylphenol                                                                                                                                                     | n.d.          | 0.86 ± 0.20  | 1.00 ± 0.86   |
|                      | Phenol, p-tert-butyl                                                                                                                                                        | n.d.          | 0.13 ± 0.19  | 0.07 ± 0.09   |
|                      | Phenol                                                                                                                                                                      | n.d.          | 0.05 ± 0.05  | 0.09 ± 0.11   |
|                      | .alpha.-Pinene                                                                                                                                                              | n.d.          | 0.07 ± 0.13  | 0.74 ± 0.36   |
|                      | Bicyclo[3.1.1]heptane, 6,6-dimethyl-2-methylene-, (1S)-1,3-Cyclohexadiene, 1-methyl-4-(1-methylethyl)-Limonene                                                              | n.d.          | 0.35 ± 0.29  | 1.01 ± 1.06   |
|                      | Bicyclo[3.1.0]hexane, 4-methylene-1-(1-methylethyl)-.gamma.-Terpinene                                                                                                       | n.d.          | 0.19 ± 0.05  | 0.62 ± 0.27   |
|                      | Benzene, 1-methyl-3-(1-methylethyl)-Linalool                                                                                                                                | n.d.          | 0.17 ± 0.04  | 0.34 ± 0.14   |
|                      |                                                                                                                                                                             | n.d.          | 0.13 ± 0.22  | 1.46 ± 0.29   |
| <b>Phenols (5)</b>   | Butylated Hydroxytoluene                                                                                                                                                    | 0.72 ± 0.21   | 0.77 ± 0.32  | 1.46 ± 0.90   |
|                      | p-Cresol                                                                                                                                                                    | 1.60 ± 1.37   | 52.90 ± 8.65 | 82.02 ± 13.05 |
|                      | 2,4-Di-tert-butylphenol                                                                                                                                                     | 16.83 ± 5.35  | 2.32 ± 0.88  | 3.99 ± 1.47   |
|                      | Phenol, p-tert-butyl                                                                                                                                                        | 12.47 ± 18.09 | 0.02 ± 0.04  | n.d.          |
|                      | Phenol                                                                                                                                                                      | n.d.          | 1.30 ± 0.29  | 0.21 ± 0.08   |
| <b>Terpenes (18)</b> | .alpha.-Pinene                                                                                                                                                              | 0.81 ± 0.29   | 0.10 ± 0.06  | 0.23 ± 0.22   |
|                      | Bicyclo[3.1.1]heptane, 6,6-dimethyl-2-methylene-, (1S)-1,3-Cyclohexadiene, 1-methyl-4-(1-methylethyl)-Limonene                                                              | 1.01 ± 0.08   | 0.01 ± 0.01  | 0.42 ± 0.64   |
|                      | Bicyclo[3.1.0]hexane, 4-methylene-1-(1-methylethyl)-.gamma.-Terpinene                                                                                                       | 1.29 ± 1.05   | n.d.         | 0.01 ± 0.03   |
|                      | Benzene, 1-methyl-3-(1-methylethyl)-Linalool                                                                                                                                | 0.11 ± 0.13   | 0.06 ± 0.04  | 0.01 ± 0.01   |
|                      |                                                                                                                                                                             | 0.14 ± 0.17   | 0.06 ± 0.06  | n.d.          |
|                      |                                                                                                                                                                             | 13.99 ± 2.69  | 0.05 ± 0.07  | 0.06 ± 0.10   |
|                      |                                                                                                                                                                             | 8.79 ± 4.25   | 0.45 ± 0.19  | 0.45 ± 0.24   |
|                      |                                                                                                                                                                             | 1.22 ± 0.75   | 0.02 ± 0.03  | n.d.          |

|                                                                                |                |              |               |
|--------------------------------------------------------------------------------|----------------|--------------|---------------|
| Caryophyllene                                                                  | 89.84 ± 27.09  | 11.47 ± 1.51 | 15.62 ± 8.18  |
| 3-Cyclohexen-1-methanol, 4-methyl-1-(1-methylethyl)-                           | 8.81 ± 13.12   | n.d.         | 1.30 ± 1.23   |
| Humulene                                                                       | 2.05 ± 0.83    | 0.37 ± 0.03  | 0.39 ± 0.28   |
| 3-Cyclohexene-1-methanol, .alpha.,.alpha.,4-trimethyl-                         | 1.52 ± 1.05    | n.d.         | 0.63 ± 0.01   |
| Naphthalene, 1,2,3,5,6,8a-hexahydro-4,7-dimethyl-1-(1-methylethyl)-, (1S-cis)- | 3.93 ± 0.96    | 0.17 ± 0.03  | 0.14 ± 0.07   |
| Benzenemethanol, .alpha.,.alpha., 4-trimethyl-                                 | 1.41 ± 0.48    | n.d.         | 0.09 ± 0.04   |
| Phenol, 2-methyl-5-(1-methylethyl)-                                            | 127.61 ± 31.18 | 7.53 ± 0.80  | 98.59 ± 32.08 |
| Benzene, 1-methyl-4-(1-methylethyl)-                                           | 0.53 ± 0.55    | 0.02 ± 0.04  | 0.76 ± 0.62   |
| Caparratriene                                                                  | n.d.           | 0.30 ± 0.34  | 1.52 ± 1.13   |
| Hexadecanal                                                                    | n.d.           | 0.82 ± 0.47  | 2.06 ± 0.26   |

---

<sup>1</sup>n.d., not detected.
